# Supplementary material
Source: publisher figshare collection journal article supplement (https://f1000.figshare.com/ndownloader/files/1908243)
Supplement: Supplementary file 1 [file 1908243]

Modification	step	Shift	Slide	Rise	Tilt	Roll	Twist
QM/MM 6bp	GC-GC	-0.22	-0.19	3.55	0.57	0.41	40.76
WT
QM/MM 6bp	CG-CG	-0.22	0.27	3.11	-0.49	1.88	38.6
WT
QM/MM 6bp	GC-GC	0.02	-0.12	0.11	-1.73	-8.58	-2.22
5-mC
QM/MM 6bp	CG-CG	0.02	0.18	3.37	2.52	-1.94	40.54
5-mC
QM/MM 2bps	GC-GC	0.17	0.22	3.37	5.18	-0.93	39.92
WT
QM/MM 2bps	CG-CG	0.24	0.01	3.15	-1.07	6.09	35.79
WT
QM/MM 2bps	GC-GC	-0.06	-0.45	3.28	7.98	4.75	37.82
5-mC
QM/MM 2bps	CG-CG	-0.82	0.53	3.63	-7.56	12.39	38.37
5-mC
